# Supplementary material for: Nicotinic acetylcholine receptor signaling maintains epithelial barrier integrity
Source: eLife. 2023 Dec 8;12:e86381. doi: 10.7554/eLife.86381 (PMC10764009; doi:10.7554/eLife.86381)
Supplement: Figure 1—source data 1. [file elife-86381-fig1-data1.xlsx]

## Sheet: Sheet1
Figure 1A
SNP	CHR	BP	gene	evidence	Drosophila ortholog	Drosophila rating	eqtl direction risk allele	agreement
rs10429950	1	218624533	TGFB2	nearest	myo, daw	no effect	not available	N/A
rs6837671	4	89873092	FAM13A	nearest	CG6424	suppressor	not available	N/A
rs2806356	6	109266255	ARMC2	nearest	CG32668	no effect	not available	N/A
rs754388	14	93115410	RIN3	coding,eqtl	spri	no effect	higher expression	N/A
rs1441358	15	71612514	THSD4	eqtl	loh	no effect	higher expression	N/A
rs12459249	19	41339896	CYP2A6	nearest	Cyp18a1, Cyp305a1	enhancer	not available	N/A
rs2955083	3	127961178	EEFSEC	eqtl	eEFSec	suppressor	higher expression	Yes
rs2955083	3	127961178	RUVBL1	eqtl	pont	no effect	lower expression	N/A
rs11727735	4	106631870	GSTCD	eqtl	CG10428	enhancer	lower expression	Yes
rs11727735	4	106631870	INTS12	eqtl	IntS12	no effect	higher expression	N/A
rs113897301	5	156929077	ADAM19	eqtl	Meltrin	enhancer	higher expression	No
rs113897301	5	156929077	NIPAL4	eqtl	spict	no effect	higher expression	N/A
rs2076295	6	7563232	DSP	eqtl	shot	suppressor	higher expression	Yes
rs721917	10	81706324	SFTPD	coding,eqtl	lectin-28C	no effect	higher expression	N/A
rs17486278	15	78867482	CHRNA3	eqtl	nAChRβ2, nAChRα4	enhancer	lower expression	Yes
rs17486278	15	78867482	CHRNA5	coding,eqtl	nAChRα1, nAChRα2, nAChRα3	enhancer	inconsistent	N/A
rs17486278	15	78867482	PSMA4	eqtl	Prosα3	no effect	higher expression	N/A
rs17707300	16	28593347	APOBR	coding	Muc11a	enhancer	not available	N/A
rs17707300	16	28593347	EIF3C	eqtl	eIF3c	enhancer	higher expression	No
rs17707300	16	28593347	EIF3CL	eqtl	eIF3c	enhancer	higher expression	No
rs17707300	16	28593347	NFATC2IP	eqtl	Rad60	enhancer	higher expression	No
rs17707300	16	28593347	NUPR1	eqtl	CG6770	enhancer	lower expression	Yes
rs17707300	16	28593347	SH2B1	eqtl	Lnk	enhancer	lower expression	Yes
rs17707300	16	28593347	SPNS1	eqtl	spin	suppressor	higher expression	Yes
rs17707300	16	28593347	SULT1A1	coding,eqtl	St1	enhancer	lower expression	Yes
rs17707300	16	28593347	SULT1A2	coding,eqtl	St1	enhancer	higher expression	No
rs17707300	16	28593347	TUFM	eqtl	mEFTu1	enhancer	higher expression	No
rs7186831	16	75473155	BCAR1	eqtl	p130CAS	no effect	inconsistent	N/A
rs7186831	16	75473155	CFDP1	eqtl	Yeti	no effect	lower expression	N/A
rs7186831	16	75473155	TMEM170A	eqtl	CG12341	enhancer	higher expression	No
