# Supplementary material for: Nicotinic acetylcholine receptor signaling maintains epithelial barrier integrity
Source: eLife. 2023 Dec 8;12:e86381. doi: 10.7554/eLife.86381 (PMC10764009; doi:10.7554/eLife.86381)
Supplement: Figure 3—figure supplement 2—source data 1. [file elife-86381-fig3-figsupp2-data1.xlsx]

## Sheet: Sheet1
Figure 3 - Figure supplement 2A,1
gene	avg_logFC	p-value
Rim	10.6381	9.04e-43
amon	10.1551	4.41e-09
brp	9.80442	1.2e-40
unc-13-4A	9.69926	1.82e-15
Rab3-GEF	9.69585	7.21e-17
IA-2	9.64071	2.27e-43
dysc	9.63308	1.44e-36
Sytbeta	9.55614	9.95e-30
CG18265	9.51188	6.43614e-06
Syt1	9.48902	1.08e-19
CG32683	9.26264	1.29e-07
pros	9.04427	2.36e-35
CG4577	9.03048	1.32e-19
7B2	8.81992	0.000972663
dac	8.67118	0.00377339
CG14989	8.65459	0.00206022
stj	8.46127	1.88e-15
nSyb	8.46057	1.42e-10
nAchRalpha5	8.41563	7.35417e-06
tbc	8.4139	5.17e-09
AstC	8.27493	0.0260385
Tk	8.17692	4.50464e-05
AstA	7.9486	0.0462429
tutl	7.53475	1.83e-08
Rgk2	7.52252	0.00052354
CCHa2	7.43444	0.0300199
dimm	7.3196	0.000112422
CG42795	7.23214	1.90777e-05
CG32547	7.18472	6.49e-09
RhoGAP100F	7.04183	6.09e-08
X11Lbeta	6.93657	1.24e-17
CCHa1	6.91444	1.5256e-06
Orcokinin	6.8017	0.0489303
DopEcR	6.7294	0.0157886
CngA	6.63573	2.62e-10
CG40498	6.3579	5.9451e-06
Appl	6.35084	1.4e-16
CG17321	6.31173	0.00303248
Pal2	6.28518	0.0317582
futsch	6.24874	4.26e-09
Rbp	6.12329	7.43e-07
nrv3	6.07406	3.75e-21
