# Supplementary material for: Nicotinic acetylcholine receptor signaling maintains epithelial barrier integrity
Source: eLife. 2023 Dec 8;12:e86381. doi: 10.7554/eLife.86381 (PMC10764009; doi:10.7554/eLife.86381)
Supplement: Figure 3—figure supplement 2—source data 2. [file elife-86381-fig3-figsupp2-data2.xlsx]

## Sheet: Sheet1
Figure 3 - Figure supplement 2B - table from Chen J et al., Mol Cells, 2016 (PMID: 27025390)
Symbol	Name	Annotation ID	RT-PCR 1)	microarray (midgut)2)	RNA-seq (4-day)3)	Gal4-expression 4)
AKH	Adipokinetic hormone	CG1171	+	ND	20	-
AstA	AllatostatinA Myoinhibiting peptide precursor Allatostatin C	CG13633	++	195.2	14	P
AstB; MIP	Myoinhibiting peptide precursor	CG6456	NP	39.6	2	M,P
AstC	Allatostatin C	CG14919	++	1441.9	53	A,M,P
Amn	amnesiac	CG11937	NP	0.4	NA	NA
Apis-ITG-like	Apis-ITG-like	CG8216	-	3.8	0	NA
Burs	bursicon alpha subunit	CG13419	++	113.5	11	-
Pburs	partner of burs	CG15284	-	NA	0	NA
CAPA	capability; CAPA1-2c CAPA-PK1	CG15520	-	4.4	0	-
CCHa1	CCHamide-1	CG14358	++	73.8	13	NA
CCHa2	CCHamide-2; CCHamide	CG14375	++	343.6	73	NA
CRZ	Corazonin	CG3302	-	4.6	0	-
CCAP	Cardioacceleratory peptide	CG4910	+	4.5	0	NA
Dh31	Diuretic hormone 31	CG13094	+	113.6	4	M,P
Dh44	Diuretic hormone 44	CG8348	-	8.4	0	-
ETH	Ecdysis triggering hormone	CG18105	+	2.3	1	-
EH	Eclosion hormone	CG5400	+	2.8	0	NA
FMRFa	FMRFamide	CG2346	NP	0.8	0	-
GPA2	Glycoprotein hormone alpha2	CG17878	-	NA	0	NA
GPB5	Glycoprotein hormone beta5	CG40041	+	NA	0	NA
Hug	Hugin	CG6371	-	4.6	0	-
ITP	ion transport peptide	CG13586	(1)-/(2)++	40.9	8	-
LK	Insectkinin;Leucokinin	CG13480	NP	ND	0	-
DILP1	Drosophila insulin-like peptide 1	CG14173	NP	1.8	0	NA
DILP2	Drosophila insulin-like peptide 2	CG8167	-	3.7	0	-
DILP3	Drosophila insulin-like peptide 3	CG14167	++	107.4	0	NA
DILP4	Drosophila insulin-like peptide 4	CG6736	-	1.1	0	-
DILP5	Drosophila insulin-like peptide 5	CG33273	-	12	0	NA
DILP6	Drosophila insulin-like peptide 6	CG14049	+	1.1	2	-
DILP7	Drosophila insulin-like peptide 7	CG13317	-	1.6	0	NA
DMS	Dromyosuppressin	CG6440	++	2.3	4	NA
NPF	neuropeptide F	CG10342	++	338.7	26	A,M,P
NPLP1	Neuropeptide-like precursor 1	CG3441	-	3.7	0	-
NPLP2	Neuropeptide-like precursor 2	CG11051	++	126.5	245	NA
NPLP3	Neuropeptide-like precursor 3	CG13061	++	ND	2	NA
NPLP4	Neuropeptide-like precursor 4	CG15361	++	ND	5	NA
Orcokinin	Orcokinin	CG15361	NP	36.3	14	A,M
PDF	Pigment-dispersing factor	CG6496	NP	1.8	0	-
Proctolin	Proctolin	CG7105	-	3	0	-
PTTH	prothoracicotropic hormone	CG13687	+	18.7	1	-
sNPF	short neuropeptide F	CG13968	+	7.4	2	NA
SIFaminde	SIFaminde	CG33527	-	4.5	0	-
DSK	Sulfakinin; Drosulfakinin	CG18090	NP	1.7	0	-
Tk	Tachykinin; Drotachykinin	CG14734	++	356.3	70	NA
SP	Sex peptide Acp70A	CG17673	-	8.8	5	NA
