# Supplementary material for: Nicotinic acetylcholine receptor signaling maintains epithelial barrier integrity
Source: eLife. 2023 Dec 8;12:e86381. doi: 10.7554/eLife.86381 (PMC10764009; doi:10.7554/eLife.86381)
Supplement: Figure 4—source data 1. [file elife-86381-fig4-data1.xlsx]

## Sheet: Sheet1
Figure 4D: Top downregulated genes
gene symbol	Flybase ID	P-value	FDR	log2(fold change)
Syt4	FBgn0028400	1.29033e-11	2.07464e-08	-8.63254
CG32581	FBgn0052581	1.30158e-10	1.14148e-07	-7.03162
LysD	FBgn0004427	1.48066e-10	1.18541e-07	-5.76216
LysC	FBgn0004426	2.40453e-13	2.31965e-09	-5.57355
CR44383	FBgn0265533	2.29868e-12	5.54385e-09	-5.53941
CG17470	FBgn0032869	4.27601e-08	8.59388e-06	-5.51469
CG9360	FBgn0030332	3.84821e-11	4.64046e-08	-5.46508
LysB	FBgn0004425	1.59742e-10	1.18541e-07	-5.10118
lectin-24A	FBgn0040104	3.54199e-11	4.64046e-08	-4.95493
CG13813	FBgn0036956	1.42376e-05	0.000433282	-4.30738
Figure 4D: Top upregulated genes
gene symbol	Flybase ID	P-value	FDR	log(fold change)
CG3345	FBgn0031240	0.000164139	0.00226207	4.45559
Ptth	FBgn0013323	2.60075e-06	0.000137768	4.25622
CG11570	FBgn0036230	3.50523e-06	0.00016415	4.01994
phr	FBgn0003082	5.61088e-10	3.86629e-07	3.97125
CG15263	FBgn0028853	0.00486222	0.0229033	3.79181
CR45822	FBgn0267472	2.92408e-09	1.34327e-06	3.43068
CG31810	FBgn0051810	8.58669e-09	2.58275e-06	3.35009
CR44628	FBgn0265839	0.000645803	0.00555759	3.1478
mthl8	FBgn0052475	2.39454e-05	0.000598449	3.12756
CG8358	FBgn0037727	6.18421e-07	5.62822e-05	3.0519
