# Supplementary material for: Nicotinic acetylcholine receptor signaling maintains epithelial barrier integrity
Source: eLife. 2023 Dec 8;12:e86381. doi: 10.7554/eLife.86381 (PMC10764009; doi:10.7554/eLife.86381)
Supplement: Figure 4—source data 2. [file elife-86381-fig4-data2.xlsx]

## Sheet: Sheet1
Figure 4H: Top downregulated genes
Gene Symbol	Flybase ID	P-value	FDR	log2(fold change)
Syt4	FBgn0028400	2.89501e-08	4.72948e-05	-8.93067
CG17470	FBgn0032869	0.000292854	0.0272568	-5.89191
CG32855	FBgn0052855	0.000250258	0.0252889	-5.38444
CG9360	FBgn0030332	1.3625e-07	0.000129027	-4.48044
Cyp4p2	FBgn0033395	8.82987e-05	0.0141974	-4.18341
Dscam4	FBgn0263219	4.81092e-08	6.53723e-05	-4.1329
LysC	FBgn0004426	0.000491152	0.0364717	-3.71715
LysB	FBgn0004425	0.00201805	0.0841742	-3.57192
CG32187	FBgn0052187	6.05901e-05	0.0109982	-3.50677
LysS	FBgn0004430	0.00027431	0.0260461	-3.43391
Figure 4H: Top upregulated genes
Gene Symbol	Flybase ID	P-value	FDR	log2(fold change)
Twdlalpha	FBgn0052574	5.79637e-07	0.000378773	4.70709
CG32568	FBgn0052568	4.39706e-05	0.00897916	4.36112
phr	FBgn0003082	1.13308e-08	3.57545e-05	3.91856
CR45822	FBgn0267472	5.33543e-08	6.53723e-05	3.46514
CR44430	FBgn0265612	6.48438e-05	0.0115563	3.34129
Spn88Eb	FBgn0038299	0.000996835	0.0555169	3.08546
CG9021	FBgn0031747	1.61889e-06	0.000881576	2.94264
CG34291	FBgn0085320	0.000233861	0.0246484	2.8098
CG11570	FBgn0036230	0.00026829	0.0260461	2.77601
CG7017	FBgn0036951	0.0024676	0.094482	2.53843
