# Supplementary material for: Nicotinic acetylcholine receptor signaling maintains epithelial barrier integrity
Source: eLife. 2023 Dec 8;12:e86381. doi: 10.7554/eLife.86381 (PMC10764009; doi:10.7554/eLife.86381)
Supplement: Supplementary file 1. — Genes highlighted in blue had a clear Drosophila ortholog and were included in the screen. Abbreviations used: SNP, single nucleotide polymorphism; CHR, chromosome; BP, base pair (GRCh37); eQTL, expression quantitative trait loci; risk allele, allele associated with increased COPD risk; Alt allele, alternative allele; OR stage1, odds ratio of risk allele in stage 1 of P.stage1, p-value in stage 1 of Hobbs et al.; P.meta, meta-analysis p-value in Hobbs et al.; Evidence.Sakornsakolpat, evidence (if available) from Sakornsakolpat et al., 2019 (GREx-genetically regulated expression, mQTL-methylation quantitative trait loci, Cod-coding association, Hi-C-chromatin interaction in human lung or IMR90 cell line, DHS-DNase hypersensitivity sites, GSet-genes identified by DEPICT, further details are available in the original publication); colocalization, probability shared causal variant between eQTL (GTEx) and COPD risk association (tissue: probability), only colocalization probability > 0.6 are listed. [file elife-86381-supp1.xlsx]

## Sheet: Column descriptions
SNP	Variant ID
CHR	Chromosome
BP	position (grch37)
gene	Candidate gene
evidence	evidence to support candidate gene assignment
Riskallele	COPD risk allele
Altallele	COPD alt allele
OR.stage1	Odds-ratio (with respect to risk allele) in stage 1 of Hobbs et al
P.stage1	P-value in stage 1 of Hobbs et al
P.meta	Meta-analysis P-value in Hobbs et al
Evidence.Sakornsakolpat	Evidence (if available) from Sakornsakolpat et al 2019)
colocalization	probablity shared causal variant between eQTL and COPD risk association (tissue: probability), only colocalization probability > 0.6 are listed
eqtl (tissue:non_effect_allele:effect_allele:beta:pvalue)	eQTL details
eqtl_direction_risk_allele	direction of eQTL expression with respect to COPD risk allele

## Sheet: original
SNP	CHR	BP	gene	evidence	Riskallele	Altallele	OR.stage1	P.stage1	P.meta	Evidence.Sakornsakolpat	colocalization	eqtl (tissue:non_effect_allele:effect_allele:beta:pvalue)	eqtl_direction_risk_allele
rs10429950	1	218624533	TGFB2	nearest	T	C	1.12	1.83e-07	1.66e-10	GREx,GSet
rs16825267	2	229569919	SPHKAP	eqtl	C	G	1.24	5.22e-08	1.68e-09		Colon_Transverse:0.94,Esophagus_Muscularis:0.61	Colon_Transverse:C:G:0.81:1.37e-09	lower expression
rs1529672	3	25520582	RARB	nearest	C	A	1.16	2.37e-09	2.47e-08	HiC,GSet
rs13141641	4	145506456	HHIP	nearest	T	C	1.23	1.16e-24	9.1e-41	GREx,DHS,GSet
rs2047409	4	106137033	TET2	nearest	A	G	1.1	1.58e-06	2.46e-13
rs6837671	4	89873092	FAM13A	nearest	G	A	1.16	1.02e-14	7.48e-15	GREx,mQTL,DHS
rs7733088	5	147856333	SPINK7	eqtl	G	A	1.18	4.4e-14	5.33e-26			Skin_Sun_Exposed_Lower_leg:G:A:0.26:2.74e-06	lower expression
rs2806356	6	109266255	ARMC2	nearest	C	T	1.12	2.84e-06	8.34e-10
rs9399401	6	142668901	GPR126	eqtl	T	C	1.14	3.59e-10	1.81e-19			Adipose_Subcutaneous:T:C:-0.32:9.74e-06	higher expression
rs754388	14	93115410	RIN3	coding,eqtl	C	G	1.2	7.07e-12	4.96e-14	mQTL,HiC,DHS,GSet	Colon_Sigmoid:0.94	Colon_Sigmoid:G:C:0.55:9.97e-08 | Esophagus_Muscularis:G:C:0.38:2.76e-06	higher expression
rs1441358	15	71612514	THSD4	eqtl	G	T	1.13	2.06e-10	8.22e-16	GREx,DHS,GSet	Artery_Aorta:0.91,Lung:0.61	Artery_Aorta:T:G:0.36:1.78e-08	higher expression
rs647097	18	8808464	SOGA2	eqtl	C	T	1.11	3.03e-06	6.14e-09			Brain_Cerebellum:T:C:-0.47:5.26e-06	lower expression
rs12459249	19	41339896	CYP2A6	nearest	C	T	1.13	2.89e-06	3.42e-08
rs2955083	3	127961178	EEFSEC	eqtl	A	T	1.2	2e-08	4.16e-13		Skin_Not_Sun_Exposed_Suprapubic:0.65,Adipose_Visceral_Omentum:0.66,Skin_Sun_Exposed_Lower_leg:0.8,Thyroid:0.64	Skin_Sun_Exposed_Lower_leg:T:A:0.22:1.96e-05	higher expression
rs2955083	3	127961178	RUVBL1	eqtl	A	T	1.2	2e-08	4.16e-13	GREx	Cells_Transformed_fibroblasts:0.79,Testis:0.79	Testis:T:A:-0.51:1.99e-12	lower expression
rs11727735	4	106631870	GSTCD	eqtl	A	G	1.27	1.55e-08	3.84e-14	mQTL		Adipose_Subcutaneous:A:G:0.63:1.30e-08	lower expression
rs11727735	4	106631870	INTS12	eqtl	A	G	1.27	1.55e-08	3.84e-14		Artery_Aorta:0.7,Artery_Aorta:0.7,Cells_Transformed_fibroblasts:0.8,Cells_Transformed_fibroblasts:0.8,Esophagus_Mucosa:0.64,Esophagus_Mucosa:0.64,Thyroid:0.67,Thyroid:0.67,Lung:0.72,Lung:0.72,Esophagus_Muscularis:0.74,Esophagus_Muscularis:0.74	Artery_Aorta:A:G:-0.46:4.38e-07 | Cells_Transformed_fibroblasts:A:G:-0.81:9.91e-18 | Esophagus_Mucosa:A:G:-0.42:5.47e-06 | Esophagus_Muscularis:A:G:-0.5:5.28e-08 | Lung:A:G:-0.51:1.73e-06 | Thyroid:A:G:-0.44:2.26e-07	higher expression
rs11727735	4	106631870	NPNT	eqtl	A	G	1.27	1.55e-08	3.84e-14	DHS,GSet	Lung:0.63,Lung:0.63	Lung:A:G:-0.33:7.07e-06	higher expression
rs113897301	5	156929077	ADAM19	eqtl	AT	A	1.2	4.52e-10	1.58e-13	GREx,mQTL,HiC,DHS,GSet	Heart_Atrial_Appendage:0.95,Esophagus_Mucosa:0.86,Lung:0.82,Testis:0.66,Stomach:0.64	Adipose_Subcutaneous:A:AT:0.29:4.14e-07 | Cells_Transformed_fibroblasts:A:AT:0.28:1.27e-06 | Esophagus_Mucosa:A:AT:0.46:2.41e-07 | Heart_Atrial_Appendage:A:AT:0.36:7.39e-07 | Lung:A:AT:0.22:7.96e-06 | Muscle_Skeletal:A:AT:0.24:1.26e-06 | Nerve_Tibial:A:AT:0.54:2.68e-13 | Skin_Sun_Exposed_Lower_leg:A:AT:0.25:5.17e-06 | Whole_Blood:A:AT:0.18:5.94e-06	higher expression
rs113897301	5	156929077	FNDC9	eqtl	AT	A	1.2	4.52e-10	1.58e-13	DHS		Artery_Aorta:A:AT:0.67:9.03e-08 | Artery_Tibial:A:AT:0.73:1.70e-11	higher expression
rs113897301	5	156929077	NIPAL4	eqtl	AT	A	1.2	4.52e-10	1.58e-13	mQTL		Nerve_Tibial:A:AT:0.48:1.50e-05	higher expression
rs2070600	6	32151443	AGER	coding	C	T	1.28	3.54e-06	5.94e-10	GREx
rs2070600	6	32151443	HLA-C	eqtl	C	T	1.28	3.54e-06	5.94e-10			Adipose_Subcutaneous:C:T:-0.89:6.59e-06 (with respect to proxy snp rs9391855)	higher expression
rs2076295	6	7563232	DSP	eqtl	T	G	1.11	4.95e-08	3.97e-09	GREx,GSet	Lung:1	Lung:T:G:-0.75:8.18e-31	higher expression
rs721917	10	81706324	MBL1P	eqtl	G	A	1.09	2.11e-06	2.49e-08			Adipose_Subcutaneous:A:G:0.27:6.37e-06 | Artery_Tibial:A:G:0.38:3.61e-08	higher expression
rs721917	10	81706324	SFTPD	coding,eqtl	G	A	1.09	2.11e-06	2.49e-08			Adipose_Subcutaneous:A:G:0.43:3.20e-08 | Artery_Aorta:A:G:0.52:1.51e-10 | Artery_Coronary:A:G:0.53:6.98e-08 | Artery_Tibial:A:G:0.57:1.33e-17 | Brain_Hippocampus:A:G:0.63:5.08e-07 | Brain_Nucleus_accumbens_basal_ganglia:A:G:0.51:2.41e-06 | Breast_Mammary_Tissue:A:G:0.5:7.30e-08 | Colon_Sigmoid:A:G:0.75:1.97e-10 | Esophagus_Gastroesophageal_Junction:A:G:0.65:1.59e-11 | Esophagus_Mucosa:A:G:0.32:8.…	higher expression
rs17486278	15	78867482	CHRNA3	eqtl	C	A	1.22	2.61e-24	1.77e-28	GREx,mQTL	Colon_Sigmoid:0.71	Muscle_Skeletal:A:C:-0.38:1.50e-08	lower expression
rs17486278	15	78867482	CHRNA5	coding,eqtl	C	A	1.22	2.61e-24	1.77e-28	GREx,mQTL,HiC	Esophagus_Muscularis:0.61,Testis:0.93	Adipose_Subcutaneous:A:C:-0.49:3.42e-11 | Adipose_Visceral_Omentum:A:C:-0.41:1.47e-06 | Artery_Tibial:A:C:-0.37:1.94e-06 | Breast_Mammary_Tissue:A:C:-0.55:3.81e-10 | Cells_Transformed_fibroblasts:A:C:-0.4:8.30e-12 | Esophagus_Mucosa:A:C:-0.22:6.44e-06 | Heart_Atrial_Appendage:A:C:-0.5:4.43e-06 | Heart_Left_Ventricle:A:C:-0.43:2.49e-06 | Muscle_Skeletal:A:C:-0.61:1.43e-19 | Nerve_Tibial:A:C:-0.58:…	inconsistent
rs17486278	15	78867482	PSMA4	eqtl	C	A	1.22	2.61e-24	1.77e-28	GREx,mQTL	Artery_Aorta:0.79,Cells_Transformed_fibroblasts:0.89	Whole_Blood:A:C:0.11:5.49e-06	higher expression
rs17707300	16	28593347	APOBR	coding	C	T	1.12	6.24e-09	6.75e-10
rs17707300	16	28593347	CCDC101	eqtl	C	T	1.12	6.24e-09	6.75e-10			Artery_Tibial:T:C:-0.17:3.08e-06 | Muscle_Skeletal:T:C:-0.18:8.28e-07	lower expression
rs17707300	16	28593347	CDC37P1	eqtl	C	T	1.12	6.24e-09	6.75e-10			Adipose_Subcutaneous:T:C:0.72:2.69e-17 | Adipose_Visceral_Omentum:T:C:0.49:3.93e-06 | Adrenal_Gland:T:C:0.59:5.27e-06 | Artery_Aorta:T:C:0.76:1.65e-15 | Artery_Coronary:T:C:0.9:2.57e-13 | Artery_Tibial:T:C:0.71:7.67e-23 | Breast_Mammary_Tissue:T:C:0.71:1.42e-11 | Cells_EBV-transformed_lymphocytes:T:C:0.87:1.02e-11 | Cells_Transformed_fibroblasts:T:C:0.48:7.43e-11 | Colon_Transverse:T:C:0.8:2.73e-…	higher expression
rs17707300	16	28593347	EIF3C	eqtl	C	T	1.12	6.24e-09	6.75e-10		Pancreas:0.63,Artery_Tibial:0.77,Skin_Sun_Exposed_Lower_leg:0.7,Whole_Blood:0.64	Adipose_Subcutaneous:T:C:0.3:2.08e-05 | Artery_Tibial:T:C:0.31:6.02e-06 | Esophagus_Muscularis:T:C:0.36:7.78e-07 | Skin_Sun_Exposed_Lower_leg:T:C:0.32:5.40e-07	higher expression
rs17707300	16	28593347	EIF3CL	eqtl	C	T	1.12	6.24e-09	6.75e-10		Pancreas:0.75,Heart_Left_Ventricle:0.83,Esophagus_Mucosa:0.76,Artery_Tibial:0.71,Thyroid:0.67,Esophagus_Muscularis:0.63,Stomach:0.65	Adipose_Subcutaneous:T:C:0.38:1.76e-08 | Artery_Aorta:T:C:0.47:3.48e-07 | Esophagus_Mucosa:T:C:0.32:1.94e-05 | Esophagus_Muscularis:T:C:0.4:2.91e-06 | Heart_Left_Ventricle:T:C:0.42:1.63e-06 | Lung:T:C:0.31:3.59e-07 | Pancreas:T:C:0.49:3.07e-06 | Skin_Sun_Exposed_Lower_leg:T:C:0.34:2.31e-10	higher expression
rs17707300	16	28593347	IL27	coding,eqtl	C	T	1.12	6.24e-09	6.75e-10		Liver:0.84,Whole_Blood:0.63,Testis:0.87	Liver:T:C:0.4:1.98e-08 | Testis:T:C:0.73:5.85e-11	higher expression
rs17707300	16	28593347	LAT	eqtl	C	T	1.12	6.24e-09	6.75e-10		Muscle_Skeletal:0.79	Muscle_Skeletal:T:C:0.27:1.28e-06	higher expression
rs17707300	16	28593347	NFATC2IP	eqtl	C	T	1.12	6.24e-09	6.75e-10		Cells_Transformed_fibroblasts:0.61,Adipose_Subcutaneous:0.76,Breast_Mammary_Tissue:0.78,Artery_Tibial:0.89,Esophagus_Muscularis:0.7,Testis:0.73	Artery_Tibial:T:C:0.18:8.56e-06 | Skin_Not_Sun_Exposed_Suprapubic:T:C:0.22:4.08e-06	higher expression
rs17707300	16	28593347	NPIPB6	eqtl	C	T	1.12	6.24e-09	6.75e-10		Brain_Cerebellum:0.62,Colon_Transverse:0.62,Skin_Sun_Exposed_Lower_leg:0.88,Whole_Blood:0.77,Testis:0.76	Skin_Sun_Exposed_Lower_leg:T:C:0.48:1.99e-16 | Testis:T:C:-0.71:4.03e-19 | Whole_Blood:T:C:0.34:2.60e-06	inconsistent
rs17707300	16	28593347	NPIPB7	eqtl	C	T	1.12	6.24e-09	6.75e-10		Brain_Frontal_Cortex_BA9:0.69,Skin_Sun_Exposed_Lower_leg:0.78	Skin_Sun_Exposed_Lower_leg:T:C:-0.37:1.39e-07 | Thyroid:T:C:0.3:2.43e-06	inconsistent
rs17707300	16	28593347	NUPR1	eqtl	C	T	1.12	6.24e-09	6.75e-10		Artery_Aorta:0.9,Brain_Cerebellum:0.65,Artery_Tibial:0.89,Thyroid:0.62,Esophagus_Muscularis:0.89	Artery_Aorta:T:C:-0.38:4.33e-06 | Artery_Tibial:T:C:-0.41:8.21e-17 | Esophagus_Muscularis:T:C:-0.31:1.66e-06	lower expression
rs17707300	16	28593347	SH2B1	eqtl	C	T	1.12	6.24e-09	6.75e-10		Adrenal_Gland:0.67,Heart_Left_Ventricle:0.74,Esophagus_Gastroesophageal_Junction:0.61,Breast_Mammary_Tissue:0.62,Adipose_Visceral_Omentum:0.9,Lung:0.81,Esophagus_Muscularis:0.71,Whole_Blood:0.77,Nerve_Tibial:0.8	Adipose_Subcutaneous:T:C:-0.18:5.64e-08 | Adipose_Visceral_Omentum:T:C:-0.17:5.19e-08 | Nerve_Tibial:T:C:-0.13:5.78e-06	lower expression
rs17707300	16	28593347	SPNS1	eqtl	C	T	1.12	6.24e-09	6.75e-10			Whole_Blood:T:C:0.16:8.16e-10	higher expression
rs17707300	16	28593347	SULT1A1	coding,eqtl	C	T	1.12	6.24e-09	6.75e-10		Brain_Caudate_basal_ganglia:0.85,Prostate:0.81,Pancreas:0.62,Artery_Aorta:0.77,Brain_Frontal_Cortex_BA9:0.83,Pituitary:0.91,Brain_Cortex:0.83,Cells_Transformed_fibroblasts:0.88,Muscle_Skeletal:0.87,Skin_Not_Sun_Exposed_Suprapubic:0.87,Brain_Cerebellum:0.88,Esophagus_Mucosa:0.87,Breast_Mammary_Tissue:0.78,Colon_Transverse:0.69,Artery_Tibial:0.92,Skin_Sun_Exposed_Lower_leg:0.91,Thyroid:0.91,Lung:0.…	Artery_Tibial:T:C:-0.3:3.36e-09 | Brain_Cerebellum:T:C:-0.52:5.90e-07 | Brain_Cortex:T:C:-0.56:4.88e-06 | Brain_Frontal_Cortex_BA9:T:C:-0.63:2.47e-06 | Cells_Transformed_fibroblasts:T:C:-0.22:4.87e-06 | Esophagus_Mucosa:T:C:-0.53:4.97e-14 | Esophagus_Muscularis:T:C:-0.36:1.49e-07 | Lung:T:C:-0.33:7.18e-08 | Muscle_Skeletal:T:C:-0.27:1.63e-07 | Nerve_Tibial:T:C:-0.46:2.32e-10 | Pancreas:T:C:-0.48:…	lower expression
rs17707300	16	28593347	SULT1A2	coding,eqtl	C	T	1.12	6.24e-09	6.75e-10		Brain_Caudate_basal_ganglia:0.84,Ovary:0.64,Brain_Nucleus_accumbens_basal_ganglia:0.81,Heart_Atrial_Appendage:0.92,Adrenal_Gland:0.87,Prostate:0.9,Spleen:0.76,Heart_Left_Ventricle:0.89,Artery_Aorta:0.82,Artery_Coronary:0.63,Brain_Hippocampus:0.87,Brain_Frontal_Cortex_BA9:0.68,Pituitary:0.69,Brain_Cortex:0.91,Esophagus_Gastroesophageal_Junction:0.88,Muscle_Skeletal:0.89,Uterus:0.86,Skin_Not_Sun_Ex…	Adipose_Subcutaneous:T:C:0.62:1.11e-20 | Adipose_Visceral_Omentum:T:C:0.63:2.86e-16 | Adrenal_Gland:T:C:1.07:1.15e-19 | Artery_Aorta:T:C:0.48:4.62e-08 | Artery_Coronary:T:C:0.37:3.87e-06 | Artery_Tibial:T:C:0.6:2.07e-15 | Brain_Cerebellum:T:C:0.58:1.14e-05 | Brain_Cortex:T:C:0.69:1.01e-07 | Brain_Hippocampus:T:C:0.68:6.20e-07 | Brain_Nucleus_accumbens_basal_ganglia:T:C:0.62:4.60e-06 | Brain_Putam…	higher expression
rs17707300	16	28593347	TUFM	eqtl	C	T	1.12	6.24e-09	6.75e-10		Ovary:0.72,Artery_Coronary:0.65,Esophagus_Gastroesophageal_Junction:0.67,Testis:0.63	Adipose_Subcutaneous:T:C:0.24:4.79e-06 | Artery_Aorta:T:C:0.4:8.25e-13 | Artery_Tibial:T:C:0.39:2.66e-19 | Brain_Putamen_basal_ganglia:T:C:0.37:4.99e-07 | Cells_Transformed_fibroblasts:T:C:0.14:2.82e-08 | Colon_Sigmoid:T:C:0.37:4.03e-06 | Colon_Transverse:T:C:0.19:3.16e-09 | Esophagus_Muscularis:T:C:0.39:2.03e-09 | Lung:T:C:0.18:4.90e-08 | Nerve_Tibial:T:C:0.33:2.58e-13 | Pancreas:T:C:0.53:9.19e-…	higher expression
rs7186831	16	75473155	BCAR1	eqtl	A	G	1.12	3.54e-06	1.12e-11	mQTL		Artery_Aorta:G:A:0.25:2.02e-07 | Artery_Tibial:G:A:0.18:1.79e-06 | Esophagus_Mucosa:G:A:-0.44:1.15e-11	inconsistent
rs7186831	16	75473155	CFDP1	eqtl	A	G	1.12	3.54e-06	1.12e-11	GREx,mQTL		Adipose_Subcutaneous:G:A:-0.19:4.20e-06 | Cells_Transformed_fibroblasts:G:A:-0.31:2.33e-10 | Nerve_Tibial:G:A:-0.22:5.17e-07	lower expression
rs7186831	16	75473155	TMEM170A	eqtl	A	G	1.12	3.54e-06	1.12e-11	mQTL		Skin_Sun_Exposed_Lower_leg:G:A:0.24:8.41e-06	higher expression

## Sheet: Fig1A
SNP	CHR	BP	gene	evidence	Drosophila ortholog
rs10429950	1	218624533	TGFB2	nearest	myo, daw
rs6837671	4	89873092	FAM13A	nearest	CG6424
rs2806356	6	109266255	ARMC2	nearest	CG32668
rs754388	14	93115410	RIN3	coding,eqtl	spri
rs1441358	15	71612514	THSD4	eqtl	loh
rs12459249	19	41339896	CYP2A6	nearest	Cyp18a1, Cyp305a1
rs2955083	3	127961178	EEFSEC	eqtl	eEFSec
rs2955083	3	127961178	RUVBL1	eqtl	pont
rs11727735	4	106631870	GSTCD	eqtl	CG10428
rs11727735	4	106631870	INTS12	eqtl	IntS12
rs113897301	5	156929077	ADAM19	eqtl	Meltrin
rs113897301	5	156929077	NIPAL4	eqtl	spict
rs2076295	6	7563232	DSP	eqtl	shot
rs721917	10	81706324	SFTPD	coding,eqtl	lectin-28C
rs17486278	15	78867482	CHRNA3	eqtl	nAChRβ2, nAChRα4
rs17486278	15	78867482	CHRNA5	coding,eqtl	nAChRα1, nAChRα2, nAChRα3
rs17486278	15	78867482	PSMA4	eqtl	Prosα3
rs17707300	16	28593347	APOBR	coding	Muc11a
rs17707300	16	28593347	EIF3C	eqtl	eIF3c
rs17707300	16	28593347	EIF3CL	eqtl	eIF3c
rs17707300	16	28593347	NFATC2IP	eqtl	Rad60
rs17707300	16	28593347	NUPR1	eqtl	CG6770
rs17707300	16	28593347	SH2B1	eqtl	Lnk
rs17707300	16	28593347	SPNS1	eqtl	spin
rs17707300	16	28593347	SULT1A1	coding,eqtl	St1
rs17707300	16	28593347	SULT1A2	coding,eqtl	St1
rs17707300	16	28593347	TUFM	eqtl	mEFTu1
rs7186831	16	75473155	BCAR1	eqtl	p130CAS
rs7186831	16	75473155	CFDP1	eqtl	Yeti
rs7186831	16	75473155	TMEM170A	eqtl	CG12341

## Sheet: Suppl Fig 1A
SNP	CHR	BP	gene	evidence	Riskallele	Altallele	OR.stage1	P.stage1	P.meta	Evidence.Sakornsakolpat	colocalization	eqtl (tissue:non_effect_allele:effect_allele:beta:pvalue)	eqtl_direction_risk_allele
rs10429950	1	218624533	TGFB2	nearest	T	C	1.12	1.83e-07	1.66e-10	GREx,GSet
rs16825267	2	229569919	SPHKAP	eqtl	C	G	1.24	5.22e-08	1.68e-09		Colon_Transverse:0.94,Esophagus_Muscularis:0.61	Colon_Transverse:C:G:0.81:1.37e-09	lower expression
rs1529672	3	25520582	RARB	nearest	C	A	1.16	2.37e-09	2.47e-08	HiC,GSet
rs13141641	4	145506456	HHIP	nearest	T	C	1.23	1.16e-24	9.1e-41	GREx,DHS,GSet
rs2047409	4	106137033	TET2	nearest	A	G	1.1	1.58e-06	2.46e-13
rs6837671	4	89873092	FAM13A	nearest	G	A	1.16	1.02e-14	7.48e-15	GREx,mQTL,DHS
rs7733088	5	147856333	SPINK7	eqtl	G	A	1.18	4.4e-14	5.33e-26			Skin_Sun_Exposed_Lower_leg:G:A:0.26:2.74e-06	lower expression
rs2806356	6	109266255	ARMC2	nearest	C	T	1.12	2.84e-06	8.34e-10
rs9399401	6	142668901	GPR126	eqtl	T	C	1.14	3.59e-10	1.81e-19			Adipose_Subcutaneous:T:C:-0.32:9.74e-06	higher expression
rs754388	14	93115410	RIN3	coding,eqtl	C	G	1.2	7.07e-12	4.96e-14	mQTL,HiC,DHS,GSet	Colon_Sigmoid:0.94	Colon_Sigmoid:G:C:0.55:9.97e-08 | Esophagus_Muscularis:G:C:0.38:2.76e-06	higher expression
rs1441358	15	71612514	THSD4	eqtl	G	T	1.13	2.06e-10	8.22e-16	GREx,DHS,GSet	Artery_Aorta:0.91,Lung:0.61	Artery_Aorta:T:G:0.36:1.78e-08	higher expression
rs647097	18	8808464	SOGA2	eqtl	C	T	1.11	3.03e-06	6.14e-09			Brain_Cerebellum:T:C:-0.47:5.26e-06	lower expression
rs12459249	19	41339896	CYP2A6	nearest	C	T	1.13	2.89e-06	3.42e-08
rs2955083	3	127961178	EEFSEC	eqtl	A	T	1.2	2e-08	4.16e-13		Skin_Not_Sun_Exposed_Suprapubic:0.65,Adipose_Visceral_Omentum:0.66,Skin_Sun_Exposed_Lower_leg:0.8,Thyroid:0.64	Skin_Sun_Exposed_Lower_leg:T:A:0.22:1.96e-05	higher expression
rs2955083	3	127961178	RUVBL1	eqtl	A	T	1.2	2e-08	4.16e-13	GREx	Cells_Transformed_fibroblasts:0.79,Testis:0.79	Testis:T:A:-0.51:1.99e-12	lower expression
rs11727735	4	106631870	GSTCD	eqtl	A	G	1.27	1.55e-08	3.84e-14	mQTL		Adipose_Subcutaneous:A:G:0.63:1.30e-08	lower expression
rs11727735	4	106631870	INTS12	eqtl	A	G	1.27	1.55e-08	3.84e-14		Artery_Aorta:0.7,Artery_Aorta:0.7,Cells_Transformed_fibroblasts:0.8,Cells_Transformed_fibroblasts:0.8,Esophagus_Mucosa:0.64,Esophagus_Mucosa:0.64,Thyroid:0.67,Thyroid:0.67,Lung:0.72,Lung:0.72,Esophagus_Muscularis:0.74,Esophagus_Muscularis:0.74	Artery_Aorta:A:G:-0.46:4.38e-07 | Cells_Transformed_fibroblasts:A:G:-0.81:9.91e-18 | Esophagus_Mucosa:A:G:-0.42:5.47e-06 | Esophagus_Muscularis:A:G:-0.5:5.28e-08 | Lung:A:G:-0.51:1.73e-06 | Thyroid:A:G:-0.44:2.26e-07	higher expression
rs11727735	4	106631870	NPNT	eqtl	A	G	1.27	1.55e-08	3.84e-14	DHS,GSet	Lung:0.63,Lung:0.63	Lung:A:G:-0.33:7.07e-06	higher expression
rs113897301	5	156929077	ADAM19	eqtl	AT	A	1.2	4.52e-10	1.58e-13	GREx,mQTL,HiC,DHS,GSet	Heart_Atrial_Appendage:0.95,Esophagus_Mucosa:0.86,Lung:0.82,Testis:0.66,Stomach:0.64	Adipose_Subcutaneous:A:AT:0.29:4.14e-07 | Cells_Transformed_fibroblasts:A:AT:0.28:1.27e-06 | Esophagus_Mucosa:A:AT:0.46:2.41e-07 | Heart_Atrial_Appendage:A:AT:0.36:7.39e-07 | Lung:A:AT:0.22:7.96e-06 | Muscle_Skeletal:A:AT:0.24:1.26e-06 | Nerve_Tibial:A:AT:0.54:2.68e-13 | Skin_Sun_Exposed_Lower_leg:A:AT:0.25:5.17e-06 | Whole_Blood:A:AT:0.18:5.94e-06	higher expression
rs113897301	5	156929077	FNDC9	eqtl	AT	A	1.2	4.52e-10	1.58e-13	DHS		Artery_Aorta:A:AT:0.67:9.03e-08 | Artery_Tibial:A:AT:0.73:1.70e-11	higher expression
rs113897301	5	156929077	NIPAL4	eqtl	AT	A	1.2	4.52e-10	1.58e-13	mQTL		Nerve_Tibial:A:AT:0.48:1.50e-05	higher expression
rs2070600	6	32151443	AGER	coding	C	T	1.28	3.54e-06	5.94e-10	GREx
rs2070600	6	32151443	HLA-C	eqtl	C	T	1.28	3.54e-06	5.94e-10			Adipose_Subcutaneous:C:T:-0.89:6.59e-06 (with respect to proxy snp rs9391855)	higher expression
rs2076295	6	7563232	DSP	eqtl	T	G	1.11	4.95e-08	3.97e-09	GREx,GSet	Lung:1	Lung:T:G:-0.75:8.18e-31	higher expression
rs721917	10	81706324	MBL1P	eqtl	G	A	1.09	2.11e-06	2.49e-08			Adipose_Subcutaneous:A:G:0.27:6.37e-06 | Artery_Tibial:A:G:0.38:3.61e-08	higher expression
rs721917	10	81706324	SFTPD	coding,eqtl	G	A	1.09	2.11e-06	2.49e-08			Adipose_Subcutaneous:A:G:0.43:3.20e-08 | Artery_Aorta:A:G:0.52:1.51e-10 | Artery_Coronary:A:G:0.53:6.98e-08 | Artery_Tibial:A:G:0.57:1.33e-17 | Brain_Hippocampus:A:G:0.63:5.08e-07 | Brain_Nucleus_accumbens_basal_ganglia:A:G:0.51:2.41e-06 | Breast_Mammary_Tissue:A:G:0.5:7.30e-08 | Colon_Sigmoid:A:G:0.75:1.97e-10 | Esophagus_Gastroesophageal_Junction:A:G:0.65:1.59e-11 | Esophagus_Mucosa:A:G:0.32:8.…	higher expression
rs17486278	15	78867482	CHRNA3	eqtl	C	A	1.22	2.61e-24	1.77e-28	GREx,mQTL	Colon_Sigmoid:0.71	Muscle_Skeletal:A:C:-0.38:1.50e-08	lower expression
rs17486278	15	78867482	CHRNA5	coding,eqtl	C	A	1.22	2.61e-24	1.77e-28	GREx,mQTL,HiC	Esophagus_Muscularis:0.61,Testis:0.93	Adipose_Subcutaneous:A:C:-0.49:3.42e-11 | Adipose_Visceral_Omentum:A:C:-0.41:1.47e-06 | Artery_Tibial:A:C:-0.37:1.94e-06 | Breast_Mammary_Tissue:A:C:-0.55:3.81e-10 | Cells_Transformed_fibroblasts:A:C:-0.4:8.30e-12 | Esophagus_Mucosa:A:C:-0.22:6.44e-06 | Heart_Atrial_Appendage:A:C:-0.5:4.43e-06 | Heart_Left_Ventricle:A:C:-0.43:2.49e-06 | Muscle_Skeletal:A:C:-0.61:1.43e-19 | Nerve_Tibial:A:C:-0.58:…	inconsistent
rs17486278	15	78867482	PSMA4	eqtl	C	A	1.22	2.61e-24	1.77e-28	GREx,mQTL	Artery_Aorta:0.79,Cells_Transformed_fibroblasts:0.89	Whole_Blood:A:C:0.11:5.49e-06	higher expression
rs17707300	16	28593347	APOBR	coding	C	T	1.12	6.24e-09	6.75e-10
rs17707300	16	28593347	CCDC101	eqtl	C	T	1.12	6.24e-09	6.75e-10			Artery_Tibial:T:C:-0.17:3.08e-06 | Muscle_Skeletal:T:C:-0.18:8.28e-07	lower expression
rs17707300	16	28593347	CDC37P1	eqtl	C	T	1.12	6.24e-09	6.75e-10			Adipose_Subcutaneous:T:C:0.72:2.69e-17 | Adipose_Visceral_Omentum:T:C:0.49:3.93e-06 | Adrenal_Gland:T:C:0.59:5.27e-06 | Artery_Aorta:T:C:0.76:1.65e-15 | Artery_Coronary:T:C:0.9:2.57e-13 | Artery_Tibial:T:C:0.71:7.67e-23 | Breast_Mammary_Tissue:T:C:0.71:1.42e-11 | Cells_EBV-transformed_lymphocytes:T:C:0.87:1.02e-11 | Cells_Transformed_fibroblasts:T:C:0.48:7.43e-11 | Colon_Transverse:T:C:0.8:2.73e-…	higher expression
rs17707300	16	28593347	EIF3C	eqtl	C	T	1.12	6.24e-09	6.75e-10		Pancreas:0.63,Artery_Tibial:0.77,Skin_Sun_Exposed_Lower_leg:0.7,Whole_Blood:0.64	Adipose_Subcutaneous:T:C:0.3:2.08e-05 | Artery_Tibial:T:C:0.31:6.02e-06 | Esophagus_Muscularis:T:C:0.36:7.78e-07 | Skin_Sun_Exposed_Lower_leg:T:C:0.32:5.40e-07	higher expression
rs17707300	16	28593347	EIF3CL	eqtl	C	T	1.12	6.24e-09	6.75e-10		Pancreas:0.75,Heart_Left_Ventricle:0.83,Esophagus_Mucosa:0.76,Artery_Tibial:0.71,Thyroid:0.67,Esophagus_Muscularis:0.63,Stomach:0.65	Adipose_Subcutaneous:T:C:0.38:1.76e-08 | Artery_Aorta:T:C:0.47:3.48e-07 | Esophagus_Mucosa:T:C:0.32:1.94e-05 | Esophagus_Muscularis:T:C:0.4:2.91e-06 | Heart_Left_Ventricle:T:C:0.42:1.63e-06 | Lung:T:C:0.31:3.59e-07 | Pancreas:T:C:0.49:3.07e-06 | Skin_Sun_Exposed_Lower_leg:T:C:0.34:2.31e-10	higher expression
rs17707300	16	28593347	IL27	coding,eqtl	C	T	1.12	6.24e-09	6.75e-10		Liver:0.84,Whole_Blood:0.63,Testis:0.87	Liver:T:C:0.4:1.98e-08 | Testis:T:C:0.73:5.85e-11	higher expression
rs17707300	16	28593347	LAT	eqtl	C	T	1.12	6.24e-09	6.75e-10		Muscle_Skeletal:0.79	Muscle_Skeletal:T:C:0.27:1.28e-06	higher expression
rs17707300	16	28593347	NFATC2IP	eqtl	C	T	1.12	6.24e-09	6.75e-10		Cells_Transformed_fibroblasts:0.61,Adipose_Subcutaneous:0.76,Breast_Mammary_Tissue:0.78,Artery_Tibial:0.89,Esophagus_Muscularis:0.7,Testis:0.73	Artery_Tibial:T:C:0.18:8.56e-06 | Skin_Not_Sun_Exposed_Suprapubic:T:C:0.22:4.08e-06	higher expression
rs17707300	16	28593347	NPIPB6	eqtl	C	T	1.12	6.24e-09	6.75e-10		Brain_Cerebellum:0.62,Colon_Transverse:0.62,Skin_Sun_Exposed_Lower_leg:0.88,Whole_Blood:0.77,Testis:0.76	Skin_Sun_Exposed_Lower_leg:T:C:0.48:1.99e-16 | Testis:T:C:-0.71:4.03e-19 | Whole_Blood:T:C:0.34:2.60e-06	inconsistent
rs17707300	16	28593347	NPIPB7	eqtl	C	T	1.12	6.24e-09	6.75e-10		Brain_Frontal_Cortex_BA9:0.69,Skin_Sun_Exposed_Lower_leg:0.78	Skin_Sun_Exposed_Lower_leg:T:C:-0.37:1.39e-07 | Thyroid:T:C:0.3:2.43e-06	inconsistent
rs17707300	16	28593347	NUPR1	eqtl	C	T	1.12	6.24e-09	6.75e-10		Artery_Aorta:0.9,Brain_Cerebellum:0.65,Artery_Tibial:0.89,Thyroid:0.62,Esophagus_Muscularis:0.89	Artery_Aorta:T:C:-0.38:4.33e-06 | Artery_Tibial:T:C:-0.41:8.21e-17 | Esophagus_Muscularis:T:C:-0.31:1.66e-06	lower expression
rs17707300	16	28593347	SH2B1	eqtl	C	T	1.12	6.24e-09	6.75e-10		Adrenal_Gland:0.67,Heart_Left_Ventricle:0.74,Esophagus_Gastroesophageal_Junction:0.61,Breast_Mammary_Tissue:0.62,Adipose_Visceral_Omentum:0.9,Lung:0.81,Esophagus_Muscularis:0.71,Whole_Blood:0.77,Nerve_Tibial:0.8	Adipose_Subcutaneous:T:C:-0.18:5.64e-08 | Adipose_Visceral_Omentum:T:C:-0.17:5.19e-08 | Nerve_Tibial:T:C:-0.13:5.78e-06	lower expression
rs17707300	16	28593347	SPNS1	eqtl	C	T	1.12	6.24e-09	6.75e-10			Whole_Blood:T:C:0.16:8.16e-10	higher expression
rs17707300	16	28593347	SULT1A1	coding,eqtl	C	T	1.12	6.24e-09	6.75e-10		Brain_Caudate_basal_ganglia:0.85,Prostate:0.81,Pancreas:0.62,Artery_Aorta:0.77,Brain_Frontal_Cortex_BA9:0.83,Pituitary:0.91,Brain_Cortex:0.83,Cells_Transformed_fibroblasts:0.88,Muscle_Skeletal:0.87,Skin_Not_Sun_Exposed_Suprapubic:0.87,Brain_Cerebellum:0.88,Esophagus_Mucosa:0.87,Breast_Mammary_Tissue:0.78,Colon_Transverse:0.69,Artery_Tibial:0.92,Skin_Sun_Exposed_Lower_leg:0.91,Thyroid:0.91,Lung:0.…	Artery_Tibial:T:C:-0.3:3.36e-09 | Brain_Cerebellum:T:C:-0.52:5.90e-07 | Brain_Cortex:T:C:-0.56:4.88e-06 | Brain_Frontal_Cortex_BA9:T:C:-0.63:2.47e-06 | Cells_Transformed_fibroblasts:T:C:-0.22:4.87e-06 | Esophagus_Mucosa:T:C:-0.53:4.97e-14 | Esophagus_Muscularis:T:C:-0.36:1.49e-07 | Lung:T:C:-0.33:7.18e-08 | Muscle_Skeletal:T:C:-0.27:1.63e-07 | Nerve_Tibial:T:C:-0.46:2.32e-10 | Pancreas:T:C:-0.48:…	lower expression
rs17707300	16	28593347	SULT1A2	coding,eqtl	C	T	1.12	6.24e-09	6.75e-10		Brain_Caudate_basal_ganglia:0.84,Ovary:0.64,Brain_Nucleus_accumbens_basal_ganglia:0.81,Heart_Atrial_Appendage:0.92,Adrenal_Gland:0.87,Prostate:0.9,Spleen:0.76,Heart_Left_Ventricle:0.89,Artery_Aorta:0.82,Artery_Coronary:0.63,Brain_Hippocampus:0.87,Brain_Frontal_Cortex_BA9:0.68,Pituitary:0.69,Brain_Cortex:0.91,Esophagus_Gastroesophageal_Junction:0.88,Muscle_Skeletal:0.89,Uterus:0.86,Skin_Not_Sun_Ex…	Adipose_Subcutaneous:T:C:0.62:1.11e-20 | Adipose_Visceral_Omentum:T:C:0.63:2.86e-16 | Adrenal_Gland:T:C:1.07:1.15e-19 | Artery_Aorta:T:C:0.48:4.62e-08 | Artery_Coronary:T:C:0.37:3.87e-06 | Artery_Tibial:T:C:0.6:2.07e-15 | Brain_Cerebellum:T:C:0.58:1.14e-05 | Brain_Cortex:T:C:0.69:1.01e-07 | Brain_Hippocampus:T:C:0.68:6.20e-07 | Brain_Nucleus_accumbens_basal_ganglia:T:C:0.62:4.60e-06 | Brain_Putam…	higher expression
rs17707300	16	28593347	TUFM	eqtl	C	T	1.12	6.24e-09	6.75e-10		Ovary:0.72,Artery_Coronary:0.65,Esophagus_Gastroesophageal_Junction:0.67,Testis:0.63	Adipose_Subcutaneous:T:C:0.24:4.79e-06 | Artery_Aorta:T:C:0.4:8.25e-13 | Artery_Tibial:T:C:0.39:2.66e-19 | Brain_Putamen_basal_ganglia:T:C:0.37:4.99e-07 | Cells_Transformed_fibroblasts:T:C:0.14:2.82e-08 | Colon_Sigmoid:T:C:0.37:4.03e-06 | Colon_Transverse:T:C:0.19:3.16e-09 | Esophagus_Muscularis:T:C:0.39:2.03e-09 | Lung:T:C:0.18:4.90e-08 | Nerve_Tibial:T:C:0.33:2.58e-13 | Pancreas:T:C:0.53:9.19e-…	higher expression
rs7186831	16	75473155	BCAR1	eqtl	A	G	1.12	3.54e-06	1.12e-11	mQTL		Artery_Aorta:G:A:0.25:2.02e-07 | Artery_Tibial:G:A:0.18:1.79e-06 | Esophagus_Mucosa:G:A:-0.44:1.15e-11	inconsistent
rs7186831	16	75473155	CFDP1	eqtl	A	G	1.12	3.54e-06	1.12e-11	GREx,mQTL		Adipose_Subcutaneous:G:A:-0.19:4.20e-06 | Cells_Transformed_fibroblasts:G:A:-0.31:2.33e-10 | Nerve_Tibial:G:A:-0.22:5.17e-07	lower expression
rs7186831	16	75473155	TMEM170A	eqtl	A	G	1.12	3.54e-06	1.12e-11	mQTL		Skin_Sun_Exposed_Lower_leg:G:A:0.24:8.41e-06	higher expression

## Sheet: risk vs screen result
SNP	CHR	BP	gene	eqtl_direction_risk_allele		screen result
rs10429950	1	218624533	TGFB2			enhancer
rs16825267	2	229569919	SPHKAP	lower expression
rs1529672	3	25520582	RARB
rs13141641	4	145506456	HHIP
rs2047409	4	106137033	TET2
rs6837671	4	89873092	FAM13A
rs7733088	5	147856333	SPINK7	lower expression
rs2806356	6	109266255	ARMC2
rs9399401	6	142668901	GPR126	higher expression
rs754388	14	93115410	RIN3	higher expression
rs1441358	15	71612514	THSD4	higher expression
rs647097	18	8808464	SOGA2	lower expression
rs12459249	19	41339896	CYP2A6
rs2955083	3	127961178	EEFSEC	higher expression
rs2955083	3	127961178	RUVBL1	lower expression
rs11727735	4	106631870	GSTCD	lower expression
rs11727735	4	106631870	INTS12	higher expression
rs11727735	4	106631870	NPNT	higher expression
rs113897301	5	156929077	ADAM19	higher expression
rs113897301	5	156929077	FNDC9	higher expression
rs113897301	5	156929077	NIPAL4	higher expression
rs2070600	6	32151443	AGER
rs2070600	6	32151443	HLA-C	higher expression
rs2076295	6	7563232	DSP	higher expression
rs721917	10	81706324	MBL1P	higher expression
rs721917	10	81706324	SFTPD	higher expression
rs17486278	15	78867482	CHRNA3	lower expression
rs17486278	15	78867482	CHRNA5	inconsistent
rs17486278	15	78867482	PSMA4	higher expression
rs17707300	16	28593347	APOBR
rs17707300	16	28593347	CCDC101	lower expression
rs17707300	16	28593347	CDC37P1	higher expression
rs17707300	16	28593347	EIF3C	higher expression
rs17707300	16	28593347	EIF3CL	higher expression
rs17707300	16	28593347	IL27	higher expression
rs17707300	16	28593347	LAT	higher expression
rs17707300	16	28593347	NFATC2IP	higher expression
rs17707300	16	28593347	NPIPB6	inconsistent
rs17707300	16	28593347	NPIPB7	inconsistent
rs17707300	16	28593347	NUPR1	lower expression
rs17707300	16	28593347	SH2B1	lower expression
rs17707300	16	28593347	SPNS1	higher expression
rs17707300	16	28593347	SULT1A1	lower expression
rs17707300	16	28593347	SULT1A2	higher expression
rs17707300	16	28593347	TUFM	higher expression
rs7186831	16	75473155	BCAR1	inconsistent
rs7186831	16	75473155	CFDP1	lower expression
rs7186831	16	75473155	TMEM170A	higher expression
