# Supplementary material for: Nicotinic acetylcholine receptor signaling maintains epithelial barrier integrity
Source: eLife. 2023 Dec 8;12:e86381. doi: 10.7554/eLife.86381 (PMC10764009; doi:10.7554/eLife.86381)
Supplement: Supplementary file 2. — RNAi lines were ranked according to the natural logarithm of the ratio between the proportion of smurfs after candidate gene knockdown and Luciferase RNAi control. Cutoff scale shown in Figure 1C was used to determine the effect of each RNAi. Based on this fine-grained ranking of individual RNAi lines, an overall rating was assigned to each gene and compared to human eQTL data (see also Figure 1A). Temperature column refers to the temperature the subsets of RNAi lines were screened at. [file elife-86381-supp2.xlsx]

## Sheet: Sheet1
SNP	Human Gene	Drosophila Gene	RNAi line	label in Fig. 1C	CG number	Temperature	Ln (Exp RNAi/ Luciferase RNAi)	Result based on scale	overall rating	eqtl_direction_risk_allele	agreement
Positive Control	NLGN2	Gli	VDRC107258KK	45	CG3903	25℃	0.47	Enhancement	Positive Control
	NLGN2	Gli	VDRC37116GD	60	CG3903	25℃	0.82	Enhancement
	NLGN2	Gli	VDRC37115GD	83	CG3903	25℃	1.4	Strong Enhancement
	CDHR2	shg	VDRC103962KK	63	CG3722	25℃	0.91	Enhancement
rs10429950	TGFB2	myo	BL36840	5	CG1838	25℃	-1.1	Suppression	Enhancer	not available	N/A
	TGFB2	myo	VDRC110195KK	87	CG1838	25℃	1.44	Strong Enhancement
	TGFB2	daw	BL50911	11	CG16987	25℃	-0.56	Weak Suppression	no effect (inconclusive)	not available	N/A
	TGFB2	daw	VDRC13420GD	13	CG16987	25℃	-0.48	Weak Suppression
	TGFB2	daw	BL34974	18	CG16987	25℃	-0.21	No effect
	TGFB2	daw	VDRC105309KK		CG16987	25℃	0.4	Weak Enhancement
rs2955083	EEFSEC	eEFSec	BL42805	4	CG9841	25℃	-1.11	Strong Suppression	Suppressor	higher expression	Y
	EEFSEC	eEFSec	VDRC105437KK	24	CG9841	25℃	0.01	No effect
	RUVBL1	pont	BL50972	17	CG4003	25℃	-0.25	No effect	no effect	lower expression	N/A
	RUVBL1	pont	VDRC105408KK	31	CG4003	25℃	0.11	No effect
rs11727735	GSTCD	CG10428	VDRC103714KK	66	CG10428	29℃	0.96	Enhancement	Enhancer	lower expression	Y
	INTS12	IntS12	VDRC103033KK	9	CG5491	25℃	-0.66	Weak Suppression	no effect (inconclusive)	higher expression	N/A
	INTS12	IntS12	VDRC27434GD	10	CG5491	25℃	-0.59	Weak Suppression
	INTS12	IntS12	BL42764	20	CG5491	25℃	-0.15	No effect
rs6837671	FAM13A	CG6424	VDRC107963KK	2	CG6424	25℃	-1.45	Strong Suppression	Suppressor	not available	N/A
	ADAM19	Meltrin	BL58331	19	CG7649	25℃	-0.16	No effect	Enhancer	higher expression	N
	ADAM19	Meltrin	VDRC3704GD	72	CG7649	29℃	1.07	Strong Enhancement
	ADAM19	Meltrin	VDRC3702GD	73	CG7649	29℃	1.09	Strong Enhancement
	ADAM19	Meltrin	VDRC27178GD	75	CG7649	29℃	1.17	Strong Enhancement
	ADAM19	Meltrin	VDRC8394GD	76	CG7649	29℃	1.23	Strong Enhancement
rs113897301	ADAM19	Meltrin	VDRC8395GD	77	CG7649	29℃	1.27	Strong Enhancement
	ADAM19	Meltrin	VDRC44407GD	81	CG7649	29℃	1.36	Strong Enhancement
	ADAM19	Meltrin	VDRC44406GD	84	CG7649	29℃	1.42	Strong Enhancement
	ADAM19	Meltrin	VDRC102041KK	85	CG7649	29℃	1.42	Strong Enhancement
	NIPAL4	spict	VDRC110180KK	12	CG12292	25℃	-0.55	Weak Suppression	no effect (inconclusive)	higher expression	N/A
	NIPAL4	spict	BL44438	15	CG12292	29℃	-0.34	Weak Suppression
	NIPAL4	spict	BL37505	41	CG12292	25℃	0.41	Weak Enhancement
rs2076295	DSP	shot	BL41858	3	CG18076	25℃	-1.39	Strong Suppression	Suppressor	higher expression	Y
	DSP	shot	BL64041	8	CG18076	25℃	-0.69	Weak Suppression
	DSP	shot	BL28336	39	CG18076	25℃	0.38	Weak Enhancement
rs2806356	ARMC2	CG32668	VDRC103633KK	14	CG32668	25℃	-0.46	Weak Suppression	no effect (inconclusive)	not available	N/A
	ARMC2	CG32668	VDRC46666GD	38	CG32668	29℃	0.33	Weak Enhancement
rs721917	SFTPD	lectin-28C	VDRC104201KK	26	CG7106	29℃	0.02	No effect	no effect	higher expression	N/A
	SFTPD	lectin-28C	VDRC45634GD	29	CG7106	29℃	0.06	No effect
rs754388	RIN3	spri	VDRC25140GD	27	CG34414	29℃	0.04	No effect	no effect (inconclusive)	higher expression	N/A
	RIN3	spri	VDRC101164KK	36	CG34414	29℃	0.31	Weak Enhancement
rs1441358	THSD4	loh	VDRC31020GD	23	CG6232	29℃	-0.01	No effect	no effect	higher expression	N/A
rs17486278	CHRNA3	nAChRα4	BL31985	16	CG12414	29℃	-0.26	No effect	Enhancer	lower expression	Y
	CHRNA3	nAChRα4	VDRC12441GD	69	CG12414	29℃	1.04	Strong Enhancement
	CHRNA3	nAChRα4	VDRC11392GD	80	CG12414	29℃	1.35	Strong Enhancement
	CHRNA5	nAChRα1	VDRC1189GD	55	CG5610	29℃	0.75	Enhancement	Enhancer	inconsistent	N/A
	CHRNA5	nAChRα1	VDRC48162GD	59	CG5610	29℃	0.81	Enhancement
	CHRNA5	nAChRα1	VDRC48159GD	62	CG5610	29℃	0.89	Enhancement
	CHRNA3	nAChRβ2	BL28038	52	CG6798	29℃	0.67	Enhancement	Enhancer	lower expression	Y
	CHRNA3	nAChRβ2	VDRC1200GD	70	CG6798	29℃	1.04	Strong Enhancement
	CHRNA3	nAChRβ2	VDRC1199GD	89	CG6798	29℃	1.54	Strong Enhancement
	CHRNA3	nAChRβ2	VDRC109450KK	90	CG6798	29℃	1.56	Strong Enhancement
	CHRNA5	nAChRα2	VDRC101760KK	30	CG6844	29℃	0.09	No effect	Enhancer	inconsistent	N/A
	CHRNA5	nAChRα2	VDRC1195GD	78	CG6844	29℃	1.29	Strong Enhancement
	CHRNA5	nAChRα2	BL27493	86	CG6844	29℃	1.42	Strong Enhancement
	CHRNA5	nAChRα2	VDRC1194GD	91	CG6844	29℃	1.6	Strong Enhancement
	CHRNA5	nAChRα3	BL27671	34	CG2302	29℃	0.19	No effect	Enhancer	inconsistent	N/A
	CHRNA5	nAChRα3	BL61225	79	CG2302	29℃	1.32	Strong Enhancement
	CHRNA5	nAChRα3	VDRC101806KK	57	CG2302	29℃	0.78	Enhancement
	PSMA4	Prosα3	BL55217	25	CG9327	29℃	0.01	No effect	no effect (inconclusive)	higher expression	N/A
	PSMA4	Prosα3	VDRC104373KK	64	CG9327	29℃	0.94	Enhancement
rs17707300	APOBR	MUC11a	BL62840	1	CG32656	25℃	-1.5	Strong Suppression	Enhancer	not available	N/A
	APOBR	MUC11a	VDRC101320KK	49	CG32656	25℃	0.53	Enhancement
	APOBR	MUC11a	VDRC24993GD	88	CG32656	29℃	1.46	Strong Enhancement
	CCDC101 | CDC37P1	eIF3c	VDRC26664GD	67	CG4954	29℃	0.97	Enhancement	Enhancer	higher expression	N
	NFATC2IP	Rad60	VDRC107905KK	44	CG4449	29℃	0.46	Enhancement	Enhancer	higher expression	N
	NFATC2IP	Rad60	VDRC26539GD	58	CG4449	29℃	0.78	Enhancement
	NUPR1	CG6770	BL27561	21	CG6770	29℃	-0.08	No effect	Enhancer	lower expression	Y
	NUPR1	CG6770	VDRC35825GD	46	CG6770	29℃	0.49	Enhancement
	NUPR1	CG6770	VDRC102402KK	47	CG6770	29℃	0.52	Enhancement
	SH2B1	Lnk	VDRC103646KK	54	CG17367	29℃	0.73	Enhancement	Enhancer	lower expression	Y
	SH2B1	Lnk	VDRC32892GD	68	CG17367	29℃	0.98	Enhancement
	SH2B1	Lnk	BL42613	74	CG17367	29℃	1.13	Strong Enhancement
	SPNS1	spin	BL27702	6	CG8428	25℃	-0.91	Suppression	Suppressor	higher expression	Y
	SPNS1	spin	VDRC46030GD	7	CG8428	25℃	-0.77	Suppression
	SPNS1	spin	VDRC105462KK	35	CG8428	25℃	0.21	Weak Enhancement
	SULT1A1 | SULT1A2	St1	VDRC43796GD	56	CG5428	29℃	0.75	Enhancement	Enhancer	lower expression/higher expression	Y (SULT1A1)
	TUFM	mEFTu1	VDRC48981GD	33	CG6050	29℃	0.18	No effect	Enhancer	higher expression	N
	TUFM	mEFTu1	VDRC48982GD	37	CG6050	29℃	0.31	Weak Enhancement
	TUFM	mEFTu1	VDRC108065KK	53	CG6050	29℃	0.68	Enhancement
rs7186831	BCAR1	p130CAS	VDRC330191SHRNA	32	CG1212	29℃	0.17	No effect	no effect (inconclusive)	inconsistent	N/A
	BCAR1	p130CAS	VDRC41479GD	51	CG1212	29℃	0.66	Enhancement
	CFDP1	Yeti	VDRC102960KK	22	CG40218	25℃	-0.03	No effect	no effect	lower expression	N/A
	TMEM170A	CG12341	VDRC7391GD	71	CG12341	29℃	1.05	Strong Enhancement	Enhancer	higher expression	N
rs12459249	CYP2A6	Cyp18a1	BL64923	28	CG6816	29℃	0.05	No effect	Enhancer	not available	N/A
	CYP2A6	Cyp18a1	VDRC104180KK	42	CG6816	29℃	0.41	Weak Enhancement
	CYP2A6	Cyp18a1	VDRC5602GD	43	CG6816	29℃	0.43	Enhancement
	CYP2A6	Cyp18a1	VDRC5601GD	61	CG6816	29℃	0.82	Enhancement
	CYP2A6	Cyp305a1	BL64963	48	CG8733	29℃	0.52	Enhancement	Enhancer	not available	N/A
	CYP2A6	Cyp305a1	VDRC101644KK	50	CG8733	29℃	0.58	Enhancement
	CYP2A6	Cyp305a1	VDRC51486GD	65	CG8733	29℃	0.95	Enhancement
	CYP2A6	Cyp305a1	VDRC51921GD	82	CG8733	29℃	1.37	Strong Enhancement
